# Supplementary material for: Pilot Studies on Empathy and Closeness in Mutual Entrainment/Improvisation vs. Formalised Dance with Different Types of Rhythm (Regular, Irregular, and No Rhythm) and Coupling (Visual, Haptic, Full Coupling): Building a Case for the Origin of Dance in Mutual Entrainment Empathic Interactions in the Mother–Infant Dyad
Source: MDPI journal article supplement (doi:10.3390/bs13100859), 2023-10-20
Supplement: s1 [file s1]

## Supplemental Materials (Tables)

### Pairwise Comparisons (simple effects)

Dependent Variable: IOS

| Coupling    | (I) Rhythm                         | (J) Rhythm                         | Mean Difference (I-J) | Std. Error | Sig. <sup>b</sup> | 95% Confidence Interval for Difference <sup>b</sup> |             |
|-------------|------------------------------------|------------------------------------|-----------------------|------------|-------------------|-----------------------------------------------------|-------------|
|             |                                    |                                    |                       |            |                   | Lower Bound                                         | Upper Bound |
| Full        | Regular rhythm                     | Irregular rhythm                   | .167                  | .557       | .766              | -.955                                               | 1.289       |
|             |                                    | Improvisation (no external rhythm) | -.833                 | .557       | .142              | -1.955                                              | .289        |
|             | Irregular rhythm                   | Regular rhythm                     | -.167                 | .557       | .766              | -1.289                                              | .955        |
|             |                                    | Improvisation (no external rhythm) | -1.000                | .557       | .079              | -2.122                                              | .122        |
|             | Improvisation (no external rhythm) | Regular rhythm                     | .833                  | .557       | .142              | -.289                                               | 1.955       |
|             |                                    | Irregular rhythm                   | 1.000                 | .557       | .079              | -.122                                               | 2.122       |
| Visual only | Regular rhythm                     | Irregular rhythm                   | .302                  | .557       | .591              | -.820                                               | 1.424       |
|             |                                    | Improvisation (no external rhythm) | -.865                 | .557       | .127              | -1.987                                              | .257        |
|             | Irregular rhythm                   | Regular rhythm                     | -.302                 | .557       | .591              | -1.424                                              | .820        |
|             |                                    | Improvisation (no external rhythm) | -1.167*               | .557       | .042              | -2.289                                              | -.045       |
|             | Improvisation (no external rhythm) | Regular rhythm                     | .865                  | .557       | .127              | -.257                                               | 1.987       |
|             |                                    | Irregular rhythm                   | 1.167*                | .557       | .042              | .045                                                | 2.289       |
| Haptic only | Regular rhythm                     | Irregular rhythm                   | .167                  | .557       | .766              | -.955                                               | 1.289       |
|             |                                    | Improvisation (no external rhythm) | .100                  | .584       | .865              | -1.077                                              | 1.277       |
|             | Irregular rhythm                   | Regular rhythm                     | -.167                 | .557       | .766              | -1.289                                              | .955        |
|             |                                    | Improvisation (no external rhythm) | -.067                 | .584       | .910              | -1.244                                              | 1.110       |
|             | Improvisation (no external rhythm) | Regular rhythm                     | -.100                 | .584       | .865              | -1.277                                              | 1.077       |
|             |                                    | Irregular rhythm                   | .067                  | .584       | .910              | -1.110                                              | 1.244       |

Based on estimated marginal means

\*. The mean difference is significant at the .05 level.

b. Adjustment for multiple comparisons: Least Significant Difference (equivalent to no adjustments).

**Table S1: Simple effects table showing a significant simple effect of visual coupling and a near significant simple effect of full feedback on closeness comparing the improvisation (mutual entrainment only) and irregular rhythm conditions, with significantly stronger closeness with improvisation (no external rhythm) (Experiment 2).**

# **Rhythm\*Coupling\*Time**

Measure: Closeness

| Rhythm                                  | Coupling    | time | Mean  | Std. Error | 95% Confidence Interval |             |
|-----------------------------------------|-------------|------|-------|------------|-------------------------|-------------|
|                                         |             |      |       |            | Lower Bound             | Upper Bound |
| Regular rhythm                          | Full        | 1    | 2.333 | .593       | 1.139                   | 3.528       |
|                                         |             | 2    | 2.667 | .556       | 1.548                   | 3.786       |
|                                         | Visual only | 1    | 2.500 | .593       | 1.305                   | 3.695       |
|                                         |             | 2    | 2.968 | .556       | 1.849                   | 4.087       |
|                                         | Haptic only | 1    | 2.833 | .593       | 1.639                   | 4.028       |
|                                         |             | 2    | 3.333 | .556       | 2.214                   | 4.452       |
| Irregular rhythm                        | Full        | 1    | 3.000 | .593       | 1.805                   | 4.195       |
|                                         |             | 2    | 3.167 | .556       | 2.048                   | 4.286       |
|                                         | Visual only | 1    | 1.667 | .593       | .472                    | 2.861       |
|                                         |             | 2    | 1.833 | .556       | .714                    | 2.952       |
|                                         | Haptic only | 1    | 2.000 | .593       | .805                    | 3.195       |
|                                         |             | 2    | 2.333 | .556       | 1.214                   | 3.452       |
| Improvisation (mutual entrainment only) | Full        | 1    | 1.667 | .593       | .472                    | 2.861       |
|                                         |             | 2    | 2.833 | .556       | 1.714                   | 3.952       |
|                                         | Visual only | 1    | 2.333 | .593       | 1.139                   | 3.528       |
|                                         |             | 2    | 3.667 | .556       | 2.548                   | 4.786       |
|                                         | Haptic only | 1    | 1.333 | .593       | .139                    | 2.528       |
|                                         |             | 2    | 2.500 | .556       | 1.381                   | 3.619       |

**Table S2: Estimated Marginal Means comparisons for each combination of levels of the rhythm and coupling factors at pre- and post- trial points for IOS scores in Experiment 2.**
